# Supplementary material for: Transcription-driven chromatin repression of Intragenic transcription start sites
Source: PLoS Genet. 2019 Feb 1;15(2):e1007969. doi: 10.1371/journal.pgen.1007969 (PMC6373976; doi:10.1371/journal.pgen.1007969)
Supplement: S2 Table — Arabidopsis CAGE peaks from [48] were analyzed for intersections with TSSs that were identified in our TSS-seq data. Rows show different annotation categories of TSSs. Cells contain the percentage values of TSSs in each annotation category which were found intersecting with the summits of CAGE peaks. Columns show the intersection statistics for different groups of TSSs (All vs Basal vs fact-specific). (XLSX) [file pgen.1007969.s014.xlsx]

## Sheet: Table_S2
	All_TSS	Basal_TSS	fact specific_TSS
intergenic	0.4698	0.5138	0.3311
proximal	0.4324	0.4755	0.2709
promoter	0.7672	0.8031	0.3514
fiveUTR	0.5367	0.5903	0.2776
intron	0.3333	0.3718	0.2432
exon	0.3024	0.3427	0.1686
threeUTR	0.367	0.4205	0.1884
antisense	0.5035	0.5538	0.3669
% represents the overlapping data between TSS clusters from this research compared to CAGE data from Tokizawa et al., 2017.
